# Supplementary material for: Harnessing PROTAC technology to combat stress hormone receptor activation
Source: PubMed Central journal article supplement (PMC10710461; doi:10.1038/s41467-023-44031-2), 2023-12-09
Supplement: 41467_2023_44031_MOESM3_ESM.pdf [file 41467_2023_44031_MOESM3_ESM.pdf]

## **Description of Additional Supplementary Files**

**File name:** Supplementary Data 1

**Description:** The Supplementary Data 1 provides NMR Spectra of PROTAC KH-95, PROTAC KH-99, PROTAC KH-102 and PROTAC KH-103 and their synthetic intermediates.

**File name:** Supplementary Data 2

**Description:** The Supplementary Data 2 provides the 5001st and the last MD frames 114 of PROTAC KH-95, PROTAC KH-99, PROTAC KH-102 and PROTAC KH-103.
